# Supplementary material
Source: HighWire-hosted journal article supplement (https://bmjopen.bmj.com/content/15/2/e085169)
Supplement: inline-supplementary-material-2 [file inline-supplementary-material-2.pdf]

**Supplementary table 1. Databases and google scholar search results for assessing level of satisfaction with HIV/AIDS treatment and care services and its associated factors among adult people receiving antiretroviral therapy in Ethiopia.**

| Databases                  | Searching terms                                                                                                                                                                                                                                                                                                                                                                                                                                                                                                                                                                                                                                                                                                                                                                                                                                                                                                                                                                                                                                                                                                                                                                                                                                                                                   | Number of studies |
|----------------------------|---------------------------------------------------------------------------------------------------------------------------------------------------------------------------------------------------------------------------------------------------------------------------------------------------------------------------------------------------------------------------------------------------------------------------------------------------------------------------------------------------------------------------------------------------------------------------------------------------------------------------------------------------------------------------------------------------------------------------------------------------------------------------------------------------------------------------------------------------------------------------------------------------------------------------------------------------------------------------------------------------------------------------------------------------------------------------------------------------------------------------------------------------------------------------------------------------------------------------------------------------------------------------------------------------|-------------------|
| PubMed                     | ("patient satisfaction"[MeSH Terms] OR ("personal"[All Fields] AND "satisfaction"[All Fields]) OR "client satisfaction"[MeSH Terms]) OR "client satisfaction"[All Fields]) AND HIV/AIDS[All Fields] AND ("therapy"[Subheading] OR "therapy"[All Fields] OR "treatment"[All Fields] OR "therapeutics"[MeSH Terms] OR "therapeutics"[All Fields]) AND care[All Fields] AND "services"[All Fields] AND associated[All Fields] AND factors[All Fields] AND ("adult"[MeSH Terms] OR "adult"[All Fields]) AND ("persons"[MeSH Terms] OR "persons"[All Fields] OR "people"[All Fields]) AND living[All Fields] AND HIV/AIDS[All Fields] AND "Ethiopia"[MeSH Terms] or "Ethiopia"[All Fields] * OR "Addis Ababa"[tw] OR "Dire Dawa"[tw] OR "east Ethiopia"[tw] OR "Harari Region"[tw] OR "Somali Region"[tw] OR "northeast Ethiopia"[tw] OR "north Ethiopia"[tw] OR "Tigray Region"[tw] OR "Afar Region"[tw] OR "northwest Ethiopia"[tw] OR "west Ethiopia"[tw] OR "southwest Ethiopia"[tw] OR "South West Ethiopia Peoples' Region"[tw] OR "Southern Nations, Nationalities, and Peoples' Region"[tw] OR "Sidama Region"[tw] OR "Oromia Region"[tw] OR "Gambela Region"[tw] OR "Benishangul-Gumuz Region"[tw] OR "Amhara Region"[tw] OR "southeast Ethiopia"[tw] OR "south Ethiopia regional state"[tw]. | 804               |
| HINARI                     | Patient satisfaction" or "client satisfaction" and "determinants" or "associated factors" and "adult" or "HIV/AIDS" and "treatment and care service" or "antiretroviral therapy services" or "ART service" and "ART clinic" or "healthcare facility" and "Ethiopia"                                                                                                                                                                                                                                                                                                                                                                                                                                                                                                                                                                                                                                                                                                                                                                                                                                                                                                                                                                                                                               | 56                |
| Scopus                     | Patient satisfaction" or "client satisfaction" and "determinants" or "associated factors" and "adult" or "HIV/AIDS" and "treatment and care service" or "antiretroviral therapy services" or "ART service" and "ART clinic" or "healthcare facility" and "Ethiopia"                                                                                                                                                                                                                                                                                                                                                                                                                                                                                                                                                                                                                                                                                                                                                                                                                                                                                                                                                                                                                               | 144               |
| African journal online     | Patient satisfaction" or "client satisfaction" and "determinants" or "associated factors" and "adult" or "HIV/AIDS" and "treatment and care service" or "antiretroviral therapy services" or "ART service" and "ART clinic" or "healthcare facility" and "Ethiopia"                                                                                                                                                                                                                                                                                                                                                                                                                                                                                                                                                                                                                                                                                                                                                                                                                                                                                                                                                                                                                               | 172               |
| Google scholar             | "Patient satisfaction" or "client satisfaction" and "determinants" or "associated factors" and "adult" or "HIV/AIDS" and "treatment and care service" or "antiretroviral therapy services" or "ART service" and "ART clinic" or "healthcare facility" and "Ethiopia"                                                                                                                                                                                                                                                                                                                                                                                                                                                                                                                                                                                                                                                                                                                                                                                                                                                                                                                                                                                                                              | 7900              |
| Total article retrieved    |                                                                                                                                                                                                                                                                                                                                                                                                                                                                                                                                                                                                                                                                                                                                                                                                                                                                                                                                                                                                                                                                                                                                                                                                                                                                                                   | 9076              |
| Number of included studies |                                                                                                                                                                                                                                                                                                                                                                                                                                                                                                                                                                                                                                                                                                                                                                                                                                                                                                                                                                                                                                                                                                                                                                                                                                                                                                   | 24                |
