# Supplementary material
Source: HighWire-hosted journal article supplement (https://bmjopen.bmj.com/content/15/2/e085169)
Supplement: inline-supplementary-material-3 [file inline-supplementary-material-3.pdf]

(Supplementary table 2). Quality assessment of studies using the modified Newcastle Ottawa scale for cross sectional studies for systematic review meta-analysis of satisfaction with HIV/AIDS treatment and care services and its associated factors among people living with HIV/AIDS in Ethiopia.

|                    | Selection (5 stars)                  |                 |                     |                                    | Comparability (2 stars)             | Outcome (3 stars)          |                      |                           |
|--------------------|--------------------------------------|-----------------|---------------------|------------------------------------|-------------------------------------|----------------------------|----------------------|---------------------------|
| Author name        | Representativeness of the sample (*) | Sample size (*) | Non-respondents (*) | Ascertainment of the exposure (**) | Confounding factors controlled (**) | Assessment of outcome (**) | Statistical test (*) | Total quality score (10*) |
| Abdissa B et al    | -                                    | *               | -                   | **                                 | **                                  | **                         | *                    | *****<br>(8)              |
| Abebe TB et al.    | *                                    | *               | *                   | -                                  | **                                  | **                         | *                    | *****<br>(8)              |
| Addisu G et al.    | *                                    | *               | *                   | **                                 | **                                  | **                         | *                    | *****<br>* (10)           |
| Atsebeha KG et al. | *                                    | *               | *                   | **                                 | **                                  | **                         | *                    | *****<br>* (10)           |
| Badacho AS et al.  | *                                    | *               | *                   | **                                 | **                                  | **                         | *                    | *****<br>* (10)           |
| Belay M et al.     | -                                    | *               | *                   | *                                  | **                                  | *                          | *                    | ***** (7)                 |
| Belete TM et al.   | *                                    | *               | *                   | *                                  | **                                  | **                         | *                    | *****<br>(9)              |
| Doyore F et al.    | -                                    | *               | *                   | *                                  | *                                   | **                         | *                    | ***** (7)                 |
| Eshetu A et al.    | *                                    | *               | -                   | *                                  | *                                   | *                          | *                    | ***** (6)                 |
| Gezahegn M et al.  | *                                    | *               | *                   | *                                  | **                                  | **                         | *                    | *****<br>(9)              |
| Girmay A et al.    | *                                    | *               | *                   | *                                  | **                                  | **                         | *                    | *****<br>(9)              |
| Habtamu A et al.   | *                                    | *               | -                   | *                                  | **                                  | **                         | *                    | *****<br>(8)              |
| Halili A et        | *                                    | *               | *                   | **                                 | **                                  | **                         | *                    | *****<br>* (10)           |

|                   |   |   |   |    |    |    |   |                 |
|-------------------|---|---|---|----|----|----|---|-----------------|
| al.               |   |   |   |    |    |    |   |                 |
| Mekonnen T et al. | * | * | * | ** | ** | ** | * | *****<br>*(10)  |
| Mindaye T et al.  | * | * | * | ** | ** | *  | * | *****<br>(9)    |
| Nigussie T et al. | * | * | * | *  | ** | ** | * | *****<br>(9)    |
| Tawiye NY et al.  | * | * | * | ** | ** | *  | * | *****<br>*(10)  |
| Tebeje M et al.   | * | * | * | *  | ** | ** | * | *****<br>(9)    |
| Tessema SB et al. | * | * | * | *  | ** | ** | * | *****<br>(9)    |
| Tiruneh CT et al. | * | * | - | *  | ** | ** | * | *****<br>(8)    |
| Uma TH et al.     | * | * | * | ** | ** | ** | * | *****<br>*(10)  |
| Worku G et al.    | - | * | - | ** | *  | ** | * | *****<br>(8)    |
| Yakob B et al.    | * | * | * | *  | ** | ** | * | *****<br>(9)    |
| Yilma TA et al.   | * | * | * | ** | ** | ** | * | *****<br>* (10) |

### Descriptions of quality measurement adapted for cross sectional study

#### Selection: (Maximum 5 stars or 5 points)

##### 1) Representativeness of the sample:

- Truly representative of the average in the target population. \* (all subjects or random sampling): **1 point**
- Somewhat representative of the average in the target population. \* (non-random sampling): **1 point**
- Selected group of users: **0**
- d) No description of the sampling strategy: **0**

##### 2) Sample size:

- Justified and satisfactory: **1 point**
- Not justified: **0**

## 3) Non-respondents:

- a) Comparability between respondents and non-respondents' characteristics is established, and the response rate is satisfactory: **1 point**
- b) The response rate is unsatisfactory, or the comparability between respondents and non-respondents is unsatisfactory: **0**
- c) No description of the response rate or the characteristics of the responders and the non-responders: **0**

## 4) Ascertainment of the exposure (risk factor):

- a) Validated measurement tool: **(2points)**
- b) Non-validated measurement tool, but the tool is available or described: **(1 point)**
- c) No description of the measurement tool. **0**

**Comparability: (Maximum 2 stars or 2 points)**

1) The subjects in different outcome groups are comparable, based on the study design or analysis. Confounding factors are controlled.

- a) The study controls for the most important factor (select one): 1 point
- b) The study control for any additional factor: 1 point

**Outcome: (Maximum 3 stars or points)**

## 1) Assessment of the outcome:

- a) Independent blind assessment: **2 points**
- b) Record linkage: **2 points**
- c) Self-report: **1 point**
- d) No description: **0**

## 2) Statistical test:

- a) The statistical test used to analyse the data is clearly described and appropriate, and the measurement of the association is presented, including confidence intervals and the probability level (p value): **1 point**
- b) The statistical test is not appropriate, not described or incomplete. **0**

**Note: 1 asterisk or star (\*) is equivalent to 1 point**

**Decisions of on the quality of the studies were based on the sum or total score:**

- **High quality studies: 7-10 points**
- **Low quality studies: 0-6 points**

**Reference:**

1. Modesti PA, Reboldi G, Cappuccio FP, et al. Panethnic differences in blood pressure in Europe: a systematic review and meta-analysis. *PLoS One*. 2016;11(1): e0147601.
2. Ssentongo P, Ssentongo AE, Heilbrunn ES, Ba DM, Chinchilli VM. Association of cardiovascular disease and 10 other pre-existing comorbidities with COVID-19 mortality: A systematic review and meta-analysis. *PLOS ONE*. 2020;15(8): e0238215.
