# Supplementary material
Source: HighWire-hosted journal article supplement (https://bmjopen.bmj.com/content/15/2/e085169)
Supplement: inline-supplementary-material-9 [file inline-supplementary-material-9.pdf]

*Supplementary table 3: Univariate meta-regression analysis to identify possible source of heterogeneity among the included studies.*

| Source of heterogeneity   | Coefficients | Standard error | 95% CI      | I <sup>2</sup> (%) | P - value |
|---------------------------|--------------|----------------|-------------|--------------------|-----------|
| Publication year          | -1.045       | 0.828          | -2.67, 0.58 | 97.71              | 0.207     |
| Sample size               | 0.031        | 0.026          | -0.02, 0.08 | 97.85              | 0.222     |
| Response rate             | 0.456        | 2.348          | -4.12, 5.04 | 98.13              | 0.845     |
| Quality of included study | 1.328        | 2.658          | -3.89, 6.54 | 98.13              | 0.617     |
