# Supplementary material
Source: HighWire-hosted journal article supplement (https://bmjopen.bmj.com/content/15/2/e085169)
Supplement: inline-supplementary-material-10 [file inline-supplementary-material-10.pdf]

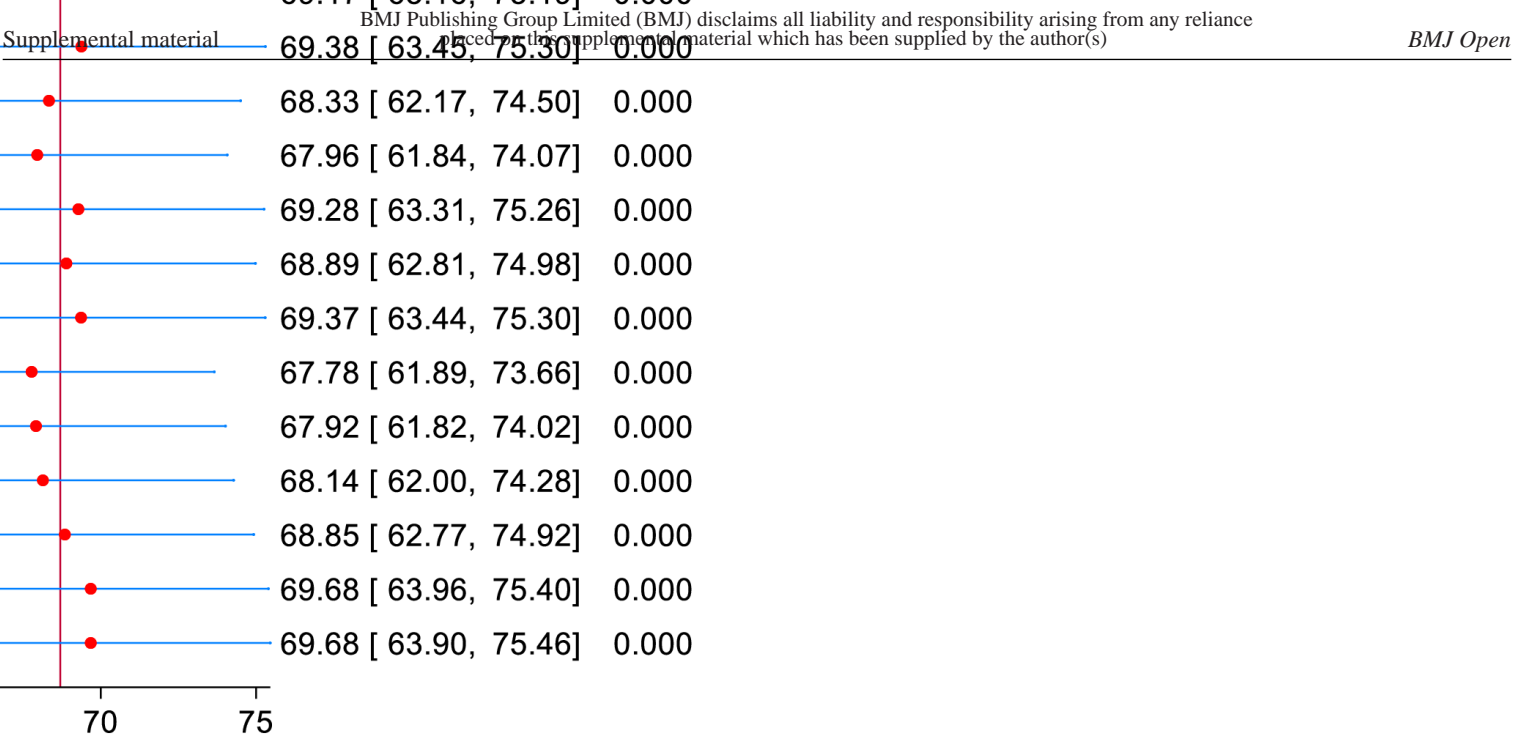

sis of the prevalence of patient satisfaction with  
each study being removed at a time: prevalence and
