# Supplementary material
Source: HighWire-hosted journal article supplement (https://bmjopen.bmj.com/content/15/2/e085169)

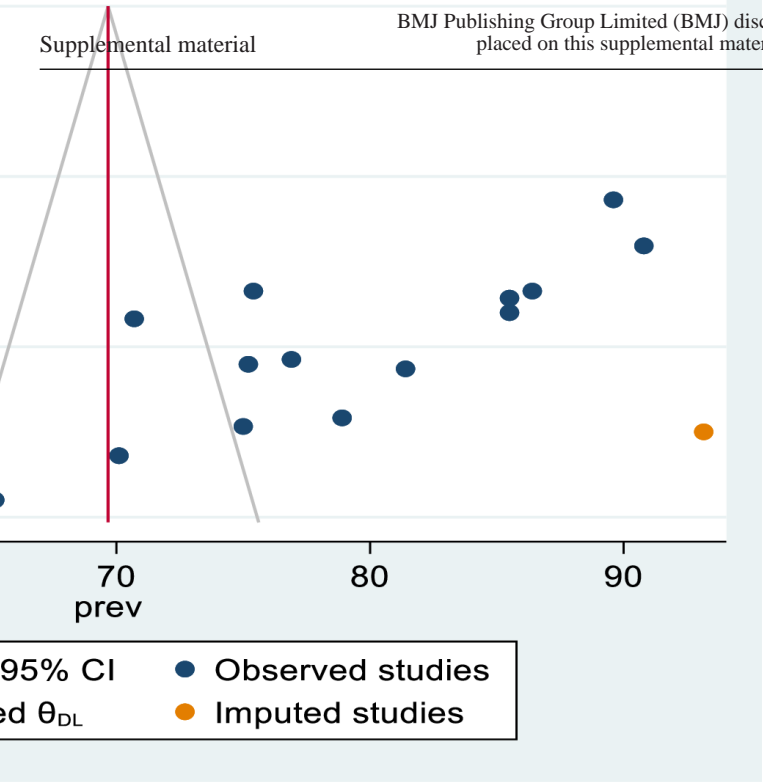

nd-fill analysis for correcting publication bias of 24

Supplement: inline-supplementary-material-4 [file inline-supplementary-material-4.pdf]
